# Supplementary material for: Self-Assembled CNF/rGO/Tannin Composite: Study of the Physicochemical and Wound Healing Properties
Source: MDPI journal article supplement (doi:10.3390/polym15122752), 2023-06-20
Supplement: s1 [file s1]

## Supplementary Materials

# Self-Assembled CNF/rGO/Tannin Composite: Study of the Physicochemical and Wound Healing Properties

Katherina Fernández <sup>1,\*</sup>, Aylen Llanquileo <sup>1</sup>, Monserrat Bustos <sup>1</sup>, Valentina Aedo <sup>1</sup>, Isleidy Ruiz <sup>1</sup>, Sebastián Carrasco <sup>1</sup>, Mauricio Tapia <sup>1</sup>, Miguel Pereira <sup>2</sup>, Manuel F. Meléndrez <sup>3</sup>, Claudio Aguayo <sup>4</sup> and Leonard I. Atanase <sup>5,6,\*</sup>

<sup>1</sup> Laboratorio de Biomateriales, Departamento de Ingeniería Química, Facultad de Ingeniería, Universidad de Concepción, Concepción 4070386, Chile; ayllanquileo@udec.cl (A.L.); monserratbustos@udec.cl (M.B.); vaedo2017@udec.cl (V.A.); isruiz@udec.cl (I.R.); scarrasco2017@udec.cl (S.C.); mtapia2017@udec.cl (M.T.)

<sup>2</sup> Laboratorio de Productos Forestales, Departamento de Ingeniería Química, Facultad de Ingeniería, Universidad de Concepción, Concepción 4070386, Chile; miguelperreira@udec.cl

<sup>3</sup> Grupo Interdisciplinario de Nanotecnología Aplicada (GINA), Laboratorio de Materiales Híbridos (HML), Departamento de Ingeniería de Materiales (DIMAT), Facultad de Ingeniería, Universidad de Concepción, Concepción 4070386, Chile; mmelendrez@udec.cl

<sup>4</sup> Departamento de Inmunología y Bioquímica Clínica, Facultad de Farmacia, Universidad de Concepción, Concepción 4070386, Chile; caguayo@udec.cl

<sup>5</sup> Faculty of Medical Dentistry, Apollonia University of Iasi, 700511 Iasi, Romania

<sup>6</sup> Academy of Romanian Scientists, 050045 Bucharest, Romania

\* Correspondence: kfernandeze@udec.cl (K.F.); leonard.atanase@yahoo.com (L.I.A.)

## 1. Materials and Methods

### 1.1 Materials

Graphite powder (flakes; mesh 325) was purchased from Asbury Online (Asbury Carbons, New Jersey, USA). Dopamine hydrochloride (*DA* – *HCl*,  $\geq 98.0\%$ ) was purchased from Sigma-Aldrich Company (St. Louis, MO). The other chemicals and solvents, such as tris(hydroxymethyl)aminomethane (buffer Tris), sulfuric acid ( $\text{H}_2\text{SO}_4$ , 98%), phosphoric acid ( $\text{H}_2\text{PO}_3$ , 85%), oxygenated water ( $\text{H}_2\text{O}_2$ , 60 vol), silver nitrate ( $\text{AgNO}_3$ , 0.1 N), potassium permanganate powder ( $\text{KMnO}_4$ , 99.9%) and hydrochloric acid ( $\text{HCl}$ , 37% v/v), were purchased from Merck (Darmstadt, Germany). These chemicals were used as received, without further purification. Milli-Q® water and distilled water were used throughout the study. Cellulases Quimizime B was provided by CHT group (Santiago, Chile).

### 1.2. Material characterization

*X-ray diffraction (XRD)*. The X-ray diffraction (XRD) was used to determine the oxidation degree of GO and the crystallinity of rGO/NCF and rGO/CNF/TA composites. The measurements were carried out on the X-ray diffractometer (Bruke Axs, D4 Endeavor, USA) with reference target: Cu K $\alpha$  radiation ( $\lambda=1,541841$  Å; 2,2 kW), voltage: 40 kV, and current: 20mA. The samples were measured from 2 to 50° during 141 s with steps of 0.02°.

*Fourier Transform Infrared Spectroscopy (FTIR).* The FTIR was used to investigate the chemical nature of interaction of rGO/NCF and rGO/CNF/TA composites. The spectra were recorded in the Perkin Elmer UATR Two FTIR Spectrometer. The wavenumber range analyzed was 4000-500 cm<sup>-1</sup> and a total of 40 accumulated scans were acquired.

*X-ray photoelectron spectroscopy (XPS).* XPS technique was used to quantitatively identify the surface chemistry of rGO/NCF and rGO/CNF/TA composites, also the raw components NCF, TA and rGO were analyzed. The measurements were carried out in a Surface Analysis Station 1 (STAIB model RQ300/2, USA) at ultravacuum conditions (< 10<sup>-9</sup> bar) equipped with a hemispherical electron analyzer (SPEC PHOIBOS 100, Germany). The photoelectrons were excited with non-monochromatic radiation Mg K $\alpha$  (1486.6 eV) and analyzed with a constant energy step of 1 eV. The X-ray source was used with a strength of 300 W.

*Thermogravimetric analysis (TGA).* TGA technique was used to evaluate the thermal stability of gelatin, GO and rGO/NCF and rGO/CNF/TA composites. The measurements were carried out in a Cahn-Versatherm thermogravimetric analyzer with sensitivity of 0.1  $\mu$ g, heating rate of 10°C/min under nitrogen atmosphere (100 mL/min) and a temperature range from 30 °C to 800 °C.

*Scanning electron microscopy (SEM).* The SEM analysis was used to investigate the micromorphology of rGO/NCF and rGO/CNF/TA composites. SEM images were recorded using a JEOL JSM-6380LV, Japan model microscope at 10 kV. The aerogels were coated using a gold sputter coater and their surfaces were observed at different resolutions. In addition, the SEM images were processed using ImageJ® software to determinate the average pore sizes.

*Surface charge measurements.* The surface charge was determined through  $\zeta$ -potential measurements using the Dynamic Light Scattering principle (SZ-100 Nano particle analyzer, Horiba Scientific, Japan). The measurements were carried out for the GO and gelatin-GO aerogels. Samples 1.0 cm<sup>3</sup> in volume were dissolved in Milli-Q® water pH 6.5, shaken and sonicated for 20 min to achieve homogeneity. Finally, the samples were measured in triplicate.

*Wettability.* A contact angle test was obtained with a Dataphysics-OCA20 instrument (Dataphysics, Filderstadt, Germany).

Figures:

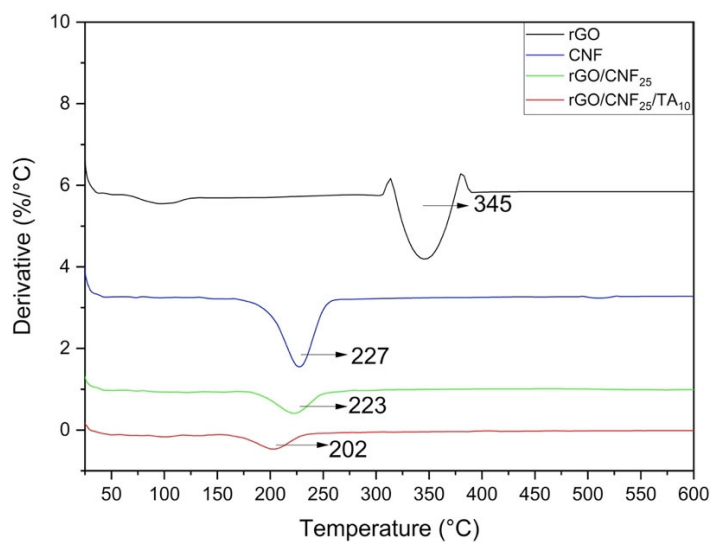

**Figure S1:** Derivative thermogravimetric analysis (DTG) of rGO, CNF, rGO/CNF<sub>25</sub> and rGO/CNF<sub>25</sub>/TA<sub>10</sub>.

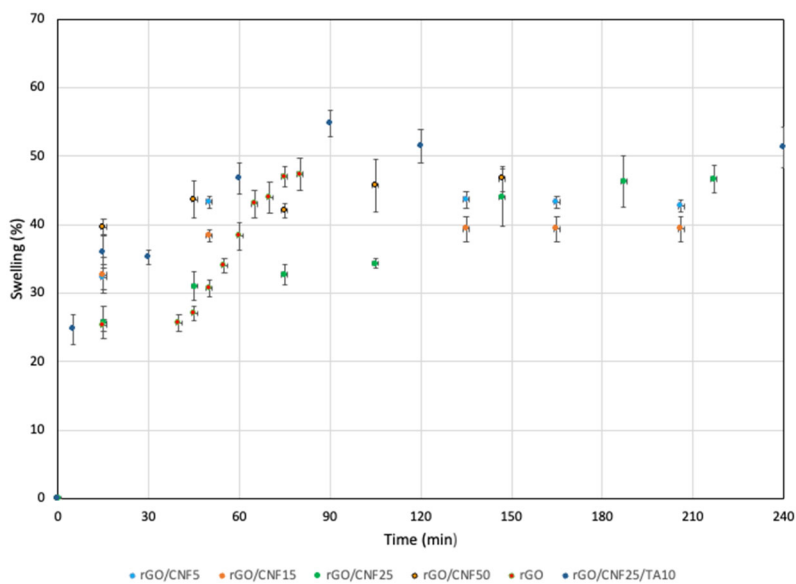

**Figure S2.** Swelling behavior of neat materials and composite samples on PBS fluid on time.

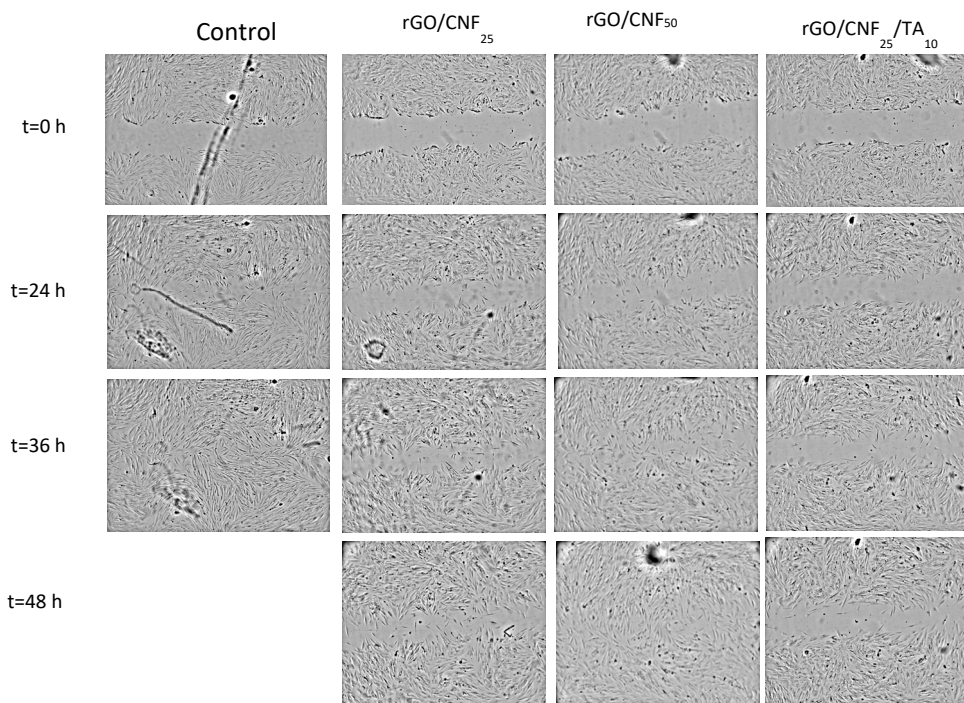

**Figure S3:** Migration of fibroblast cells in Scratch test (wound healing) for several samples

**Table S1.** Phenol composition and content of the *Pinus Radiata* bark extract

| Compounds                       | Content (mg per gram of extract) |
|---------------------------------|----------------------------------|
| (-)-Catechin                    | 13.8                             |
| Taxifolin                       | 13.9                             |
| p-Hydroxybenzoic acid           | 7.6                              |
| Homovanillic acid a             | 6.7                              |
| Quercetin                       | 4.3                              |
| Proanthocyanidin B-2            | 3.3                              |
| (+)-Epicatechin                 | 2.8                              |
| Dihydroxybenzoic acid b         | 2.7                              |
| Dihydroxybenzoic acid b         | 1.8                              |
| Syringic acid a                 | 1.1                              |
| 3,4-dihydroxyphenyl acetic acid | 0.9                              |
| Dihydroxybenzoic acid b         | 0.2                              |
| Epigallocatechin                | n.d.                             |

n.d.: not detected, a: tentatively identified compounds, b: not recognized isomers.

**Table S2.** Average molecular weight number (Mn) of pine extracts at different percentages of sample development, determinate by GPC.

| % sample development | Mn    |
|----------------------|-------|
| 10                   | 438   |
| 25                   | 749   |
| 50                   | 1355  |
| 100                  | 63277 |

**Table S3.** Surface charge and contact angle of the samples

| Sample                                 | Surface charge (mV) | Contact Angle (°) |
|----------------------------------------|---------------------|-------------------|
| CNF                                    | -53.3 ± 1.7         | 46.6 ± 0.9        |
| GO                                     | -96.9 ± 3.8         | 61.8 ± 0.6        |
| rGO/CNF <sub>5</sub>                   | -33.9 ± 3.1         | 70.5 ± 2.9        |
| rGO/CNF <sub>15</sub>                  | -33.7 ± 2.7         | 73.9 ± 2.5        |
| rGO/CNF <sub>25</sub>                  | -28.1 ± 2.1         | 83.8 ± 2.9        |
| rGO/CNF <sub>50</sub>                  | -32.1 ± 1.4         | 89.4 ± 2.5        |
| rGO/CNF <sub>25</sub> /TA <sub>5</sub> | -85.2 ± 0.5         | 84.3 ± 1.0        |
| GO/CNF <sub>25</sub> /TA <sub>10</sub> | -89.7 ± 3.5         | 72.0 ± 2.6        |

**Table S4:** Initial moisture content of the samples

| Sample                                 | Moisture Content (%) |
|----------------------------------------|----------------------|
| CNF                                    | 8.3 ± 0.4            |
| rGO/CNF <sub>5</sub>                   | 15.0 ± 0.8           |
| rGO/CNF <sub>15</sub>                  | 12.0 ± 0.6           |
| rGO/CNF <sub>25</sub>                  | 11.7 ± 0.6           |
| rGO/CNF <sub>50</sub>                  | 11.6 ± 0.6           |
| rGO/CNF <sub>25</sub> /TA <sub>5</sub> | 11.7 ± 0.6           |
| GO/CNF <sub>25</sub> /TA <sub>10</sub> | 12.5 ± 0.6           |
